# Supplementary material for: Pharmacodynamics of rituximab on B lymphocytes in paediatric patients with autoimmune diseases
Source: PubMed Central journal article supplement (PMC6624401; doi:10.1111/bcp.13970), 2019-06-20
Supplement: BCP-85-1790-s001.pdf [file BCP-85-1790-s001.pdf]

# SUPPLEMENTARY MATERIAL: Pharmacodynamics of rituximab on B lymphocytes in paediatric patients with autoimmune diseases

## Contents

- 1 Further goodness of fit plot 1
- 2 NONMEM model file with values set to final estimates 2

### 1 Further goodness of fit plot

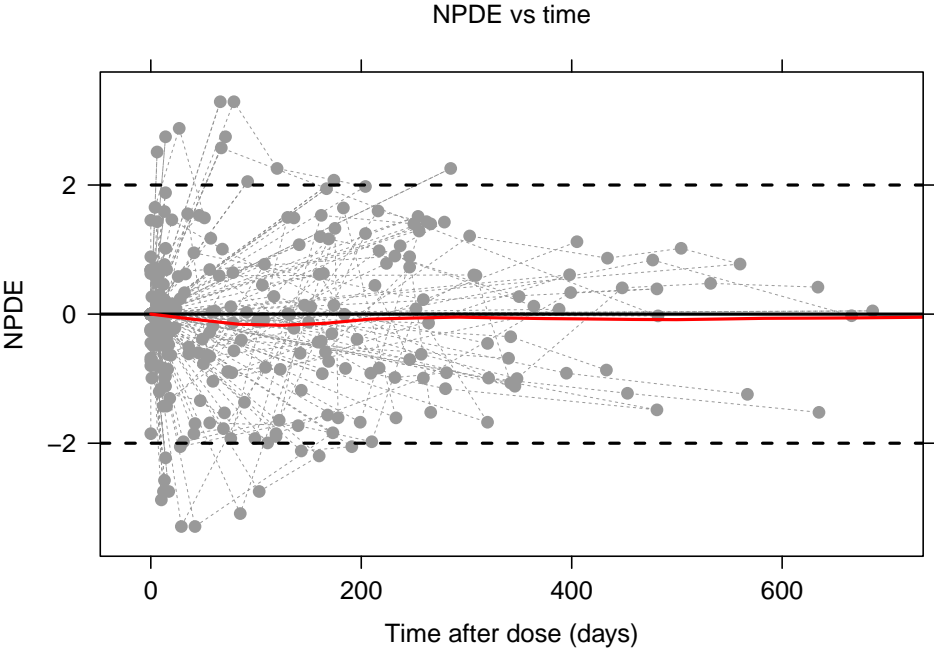

Figure S1: Normalised Prediction Distribution Errors (NPDE) versus time

## 2 NONMEM model file with values set to final estimates

```
;; 1. Based on:
;; 2. Description: Rituximab KPD modelling for the time course of B cell count
;; AUTHOR: SP
;; DATE: 14-MAR-2018
;; UNITS: AMT:MG, TIME:DAY, DV:106/L
;; MODEL STRUCTURE: KPD (KE ON DOSE)
;; ERROR MODEL: PROP
;; COVARIATE: MTX AND CTX ON EMAX
$PROBLEM Rituximab KPD modelling for the time course of B cell count

$INPUT ID TIME CMT AMT DV EVID MDVO SEX AGE AGEY AZA CSA CTX CTX_OLD DXM
      FCT HCT MTX MEP MMF PRE TAC DGNS TAD BLQ

$DATA rituximab_181205.csv IGNORE=@

$SUBROUTINE ADVAN6 TOL=6
$MODEL      COMP=(DOSE) COMP=(BCELL)
$PK
;-----Model parameters-----
KE   = THETA(1) * EXP(ETA(1))
BSL  = THETA(2) * EXP(ETA(2))
KOUT = THETA(3) * EXP(ETA(3))
;-----Covariates-----
CCOV = 0
IF (CTX.EQ.1) CCOV = THETA(7)
CCOV1 = 0
IF (MTX.EQ.1) CCOV1 = THETA(8)
;-----Drug effect-----
EMAX = THETA(4) * (1 + CCOV) * (1 + CCOV1)
ED50 = THETA(5)
;-----Rate constants and initialise-----
KIN = BSL * KOUT
A_0(2) = BSL
;-----Proportional error-----
CV = THETA(6)

$DES
DADT(1) = -KE * A(1)
DG      = (EMAX * A(1)) / (ED50 + A(1))
DADT(2) = KIN - KOUT*(1 + DG) * A(2)

$ERROR
IPRED = A(2)
SD     = SQRT(0.0001 + CV*IPRED**2)
Y      = IPRED + SD*EPS(1)
IRES   = DV-IPRED
IWRES  = IRES / SD

$THETA
(0,0.0359064) ; KE
(0,266.449)   ; BSL
```

```

(0,0.0160064) ; KOUT (per day)
(0,35.1538) ; EMAX
(0,0.811751) ; ED50 (mg)
(0,0.351255) ; CV
(-1,0.381171) ; CCOV
(-1,0.657277) ; CCOV1
$OMEGA
0.54598 ; BSV_KE
0.96308 ; BSV_BSL
0.803053 ; BSV_KOUT
$SIGMA 1 FIX
$ESTIMATION METHOD=1 INTER MAXEVALS=9999 POSTHOC NOABORT PRINT=1
$COVARIANCE UNCONDITIONAL PRINT=E MATRIX=S
$TABLE ID TIME AMT EVID IPRED CWRES IWRES TAD NPDE ESAMPLE=1000
ONEHEADER NOPRINT FILE=sdtab20
$TABLE ID KE BSL KOUT EMAX ED50 ETA1 ETA2 ETA3 NOPRINT NOAPPEND
ONEHEADER FILE=patab20
$TABLE ID AGE AGEY NOPRINT NOAPPEND ONEHEADER FILE=cotab20
$TABLE ID GENDE AZA CSA CTX DXM FCT HCT MTX MEP MMF PRE TAC BLQ
NOPRINT NOAPPEND ONEHEADER FILE=catab20

```
